# Supplementary material
Source: publisher figshare collection journal article supplement (https://sage.figshare.com/ndownloader/files/17763356)
Supplement: Supplementary file 1 [file 17763356]

## Appendix F. Scatterplots using different weight matrixes in 2003 and 2016

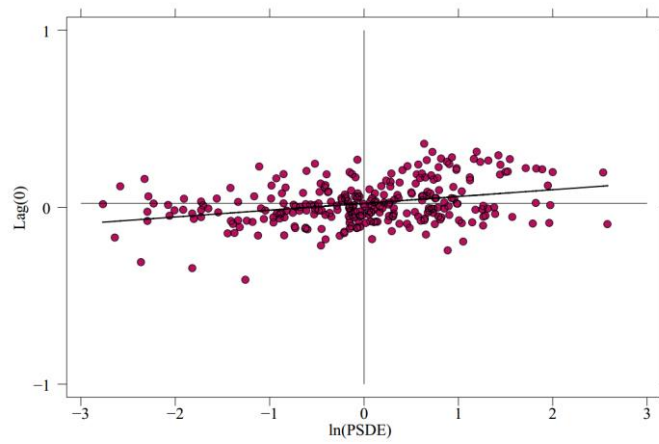

Fig. F.1 Moran scatterplot for SO2 emissions based on inverse distance weight matrix in 2003

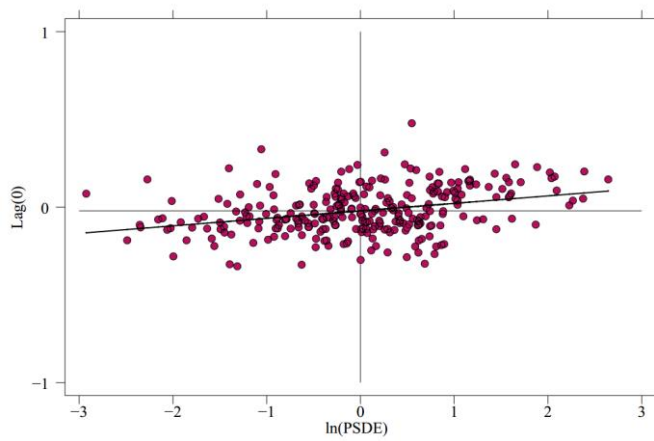

Fig. F.2 Moran scatterplot for SO2 emissions based on inverse distance weight matrix in 2016

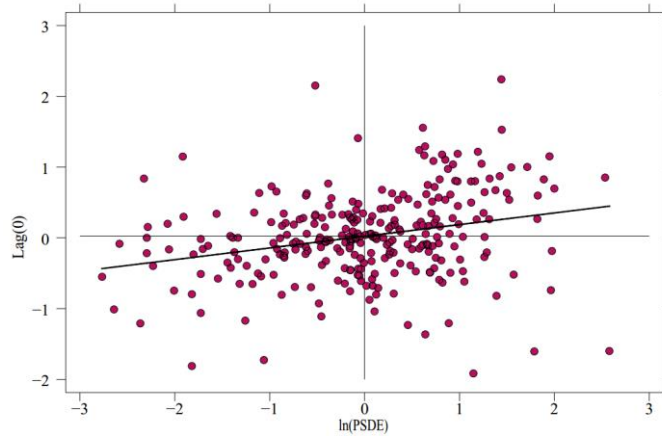

Fig. F.3 Moran scatterplot for SO2 emissions based on first-order contiguity weight matrix in 2003

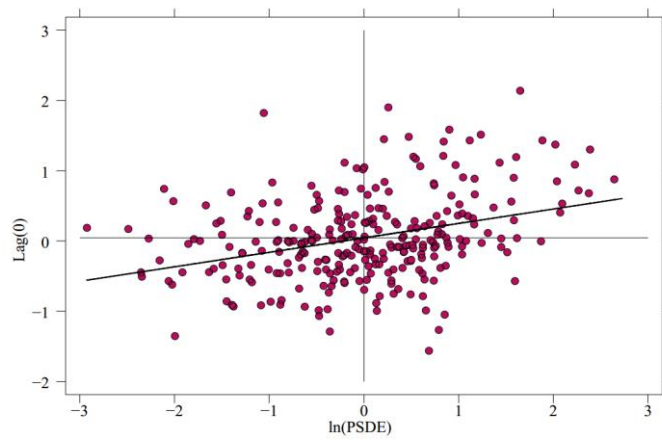

Fig. F.4 Moran scatterplot for SO2 emissions based on first-order contiguity weight matrix in 2016

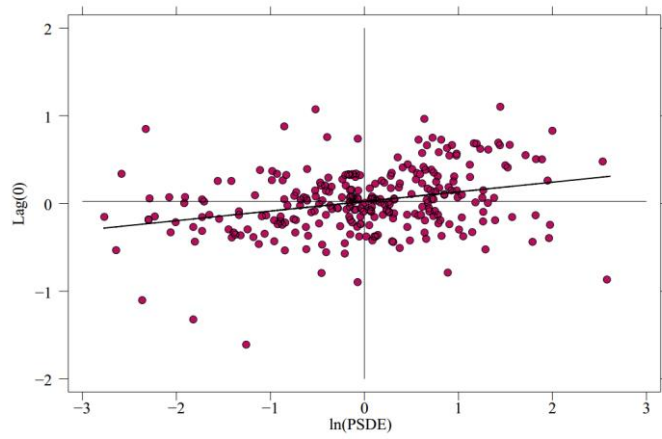

Fig. F.5 Moran scatterplot for SO2 emissions based on inverse squared distance weight matrix in 2003

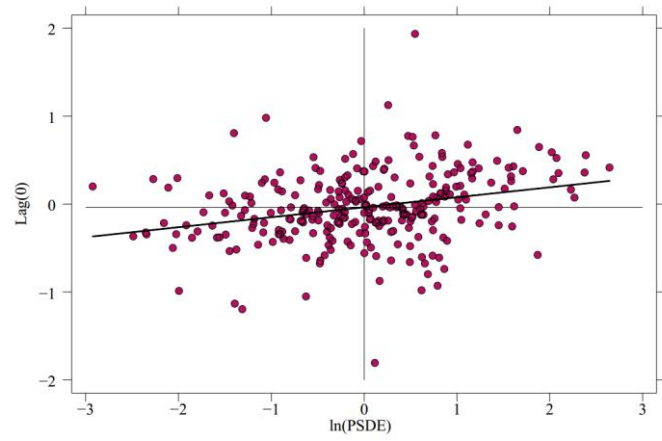

Fig. F.6 Moran scatterplot for SO2 emissions based on inverse squared distance weight matrix in 2016
